# Supplementary material
Source: MDPI journal article supplement (https://www.mdpi.com/2075-163X/13/2/274)
Supplement: s1 [file s1]

**Table S2.** Pb isotope compositions for sulfides in the Heihaibei gold deposit and other typical gold deposits in the EKO from the literature.

| No. | Sample             | Rock Type                         | Ore Type       | Mineral      | $^{206}\text{Pb}/^{204}\text{Pb}$ | $^{207}\text{Pb}/^{204}\text{Pb}$ | $^{208}\text{Pb}/^{204}\text{Pb}$ | Ore District | References |
|-----|--------------------|-----------------------------------|----------------|--------------|-----------------------------------|-----------------------------------|-----------------------------------|--------------|------------|
| 1   | HHBZK01-B3         | brecciated smoky grey quartz vein | Qv2            | pyrite       | 18.8122                           | 15.7002                           | 38.8055                           | Heihaibei    | this study |
| 2   | HHBZK1002-B4       | brecciated white quartz vein      | Qv1            | pyrite       | 19.0007                           | 15.7062                           | 38.7655                           | Heihaibei    | this study |
| 3   | HHB08-JK08         | smoky grey quartz vein            | Qv2            | pyrite       | 18.7219                           | 15.6959                           | 38.7356                           | Heihaibei    | this study |
| 4   | HHB08-JK19         | smoky grey quartz vein            | Qv2            | pyrite       | 18.8262                           | 15.6998                           | 38.7836                           | Heihaibei    | this study |
| 5   | HHBZK01-B11        | monzogranite                      | wall rock      | K-feldspar   | 18.4283                           | 15.6789                           | 38.4342                           | Heihaibei    | this study |
| 6   | HHBZK01-B14        | granodiorite                      | wall rock      | K-feldspar   | 18.4363                           | 15.6808                           | 38.4532                           | Heihaibei    | this study |
| 7   | HHBZK1003-B7       | granodiorite                      | wall rock      | K-feldspar   | 18.4864                           | 15.6475                           | 38.1750                           | Heihaibei    | this study |
| 8   | HHB01-B9           | monzogranite                      | wall rock      | K-feldspar   | 18.4368                           | 15.6812                           | 38.4598                           | Heihaibei    | this study |
| 9   | HHB07-B1-1         | granodiorite                      | wall rock      | K-feldspar   | 18.3532                           | 15.6750                           | 38.3713                           | Heihaibei    | this study |
| 10  | HHB07-B1-2         | granodiorite                      | wall rock      | K-feldspar   | 18.3537                           | 15.6753                           | 38.3724                           | Heihaibei    | this study |
| 11  | K1                 | silicificated monzogranite        | Qv1+wall rocks | pyrite       | 19.188                            | 15.713                            | 39.235                            | Heihaibei    | [23]       |
| 12  | K5                 | smoky grey quartz vein            | Qv2            | pyrite       | 18.722                            | 15.695                            | 38.728                            | Heihaibei    | [23]       |
| 13  | K12                | smoky grey quartz vein            | Qv2            | pyrite       | 18.724                            | 15.699                            | 38.746                            | Heihaibei    | [23]       |
| 14  | ZK5601-16          | phyllitic rock                    |                | pyrite       | 18.652                            | 15.683                            | 38.63                             | Dazaohuo     | [29]       |
| 15  | ZK2417-12          | phyllitic rock                    |                | pyrite       | 18.562                            | 15.669                            | 38.613                            | Dazaohuo     | [29]       |
| 16  | ZK1609-5           | phyllitic rock                    |                | pyrite       | 18.55                             | 15.668                            | 38.629                            | Dazaohuo     | [29]       |
| 17  | ZK1609-11          | phyllitic rock                    |                | pyrite       | 18.41                             | 15.631                            | 38.445                            | Dazaohuo     | [29]       |
| 18  | ZK3209-10          | phyllitic rock                    |                | pyrite       | 18.562                            | 15.676                            | 38.545                            | Dazaohuo     | [29]       |
| 19  | ZK3209-17          | phyllitic rock                    |                | pyrite       | 18.598                            | 15.633                            | 38.419                            | Dazaohuo     | [29]       |
| 20  | ZK0709-8           | phyllitic rock                    |                | pyrite       | 18.584                            | 15.641                            | 38.739                            | Dazaohuo     | [29]       |
| 21  | XI-3390NCM11-B1Apy | phyllitic brecciated granite      |                | arsenopyrite | 18.436                            | 15.638                            | 38.462                            | Shenshuitan  | [4]        |
| 22  | XI-3390NCM11-B1Po  | phyllitic brecciated granite      |                | pyrrhotite   | 18.402                            | 15.605                            | 38.374                            | Shenshuitan  | [4]        |
| 23  | XI-3390NCM11-B1Py  | phyllitic brecciated granite      |                | pyrite       | 18.358                            | 15.582                            | 38.399                            | Shenshuitan  | [4]        |
| 24  | XI-3390NCM11-B2Apy | phyllitic brecciated granite      |                | arsenopyrite | 18.254                            | 15.600                            | 38.201                            | Shenshuitan  | [4]        |
| 25  | XI-3390NCM11-B2Po  | phyllitic brecciated granite      |                | pyrrhotite   | 18.400                            | 15.616                            | 38.416                            | Shenshuitan  | [4]        |
| 26  | XI-3390NCM11-B2Py  | phyllitic brecciated granite      |                | pyrite       | 19.341                            | 15.606                            | 38.307                            | Shenshuitan  | [4]        |
| 27  | XI-3390NCM11-B3Apy | phyllitic brecciated granite      |                | arsenopyrite | 18.071                            | 15.530                            | 37.908                            | Shenshuitan  | [4]        |
| 28  | XI-3390NCM11-B3Py  | phyllitic brecciated granite      |                | pyrite       | 18.463                            | 15.600                            | 38.669                            | Shenshuitan  | [4]        |

|    |                            |                                                         |              |        |        |        |             |     |
|----|----------------------------|---------------------------------------------------------|--------------|--------|--------|--------|-------------|-----|
| 29 | XI-<br>3390NCM17-<br>B1Py  | phyllic brecciated<br>granite                           | pyrite       | 18.584 | 15.624 | 38.521 | Shenshuitan | [4] |
| 30 | XI-<br>3390NCM17-<br>B2Apy | phyllic brecciated<br>granite                           | arsenopyrite | 18.561 | 15.658 | 38.628 | Shenshuitan | [4] |
| 31 | XI-<br>3390NCM17-<br>B2Po  | phyllic brecciated<br>granite                           | pyrrhotite   | 18.555 | 15.651 | 38.702 | Shenshuitan | [4] |
| 32 | XI-<br>3390NCM17-<br>B2Py  | phyllic brecciated<br>granite                           | pyrite       | 18.470 | 15.656 | 38.605 | Shenshuitan | [4] |
| 33 | XI-<br>3390NCM27-<br>B1Py  | phyllic brecciated<br>granite                           | pyrite       | 18.530 | 15.650 | 38.581 | Shenshuitan | [4] |
| 34 | XI-<br>3390NCM27-<br>B2Apy | phyllic brecciated<br>granite                           | arsenopyrite | 18.441 | 15.639 | 38.505 | Shenshuitan | [4] |
| 35 | XI-<br>3390NCM27-<br>B3Apy | pyritized slate                                         | arsenopyrite | 18.459 | 15.629 | 38.459 | Shenshuitan | [4] |
| 36 | XI-<br>3390NCM27-<br>B3Po  | pyritized slate                                         | pyrrhotite   | 18.409 | 15.595 | 38.295 | Shenshuitan | [4] |
| 37 | XI-<br>3390NCM29-<br>B1Po  | phyllic brecciated<br>granite                           | pyrrhotite   | 18.400 | 15.605 | 38.341 | Shenshuitan | [4] |
| 38 | XI-<br>3390NCM29-<br>B1Py  | phyllic brecciated<br>granite                           | pyrite       | 18.398 | 15.620 | 38.401 | Shenshuitan | [4] |
| 39 | XI-<br>3390NCM29-<br>B2Apy | phyllic brecciated<br>granite                           | arsenopyrite | 18.427 | 15.628 | 38.467 | Shenshuitan | [4] |
| 40 | XI-<br>3390NCM29-<br>B2Py  | phyllic brecciated<br>granite                           | pyrite       | 18.440 | 15.644 | 38.517 | Shenshuitan | [4] |
| 41 | XI-<br>3390NCM29-<br>B3Apy | phyllic brecciated<br>granite                           | arsenopyrite | 18.418 | 15.626 | 38.458 | Shenshuitan | [4] |
| 42 | XI-<br>3390NCM29-<br>B3Py  | phyllic brecciated<br>granite                           | pyrite       | 18.444 | 15.655 | 38.554 | Shenshuitan | [4] |
| 43 | XI-<br>3390NCM29-<br>B4Apy | phyllic brecciated<br>granite                           | arsenopyrite | 18.439 | 15.613 | 38.401 | Shenshuitan | [4] |
| 44 | XI-<br>3390NCM29-<br>B4Po  | phyllic brecciated<br>granite                           | pyrrhotite   | 18.570 | 15.604 | 38.347 | Shenshuitan | [4] |
| 45 | XI-<br>3390NCM29-<br>B4Py  | phyllic brecciated<br>granite                           | pyrite       | 18.438 | 15.632 | 38.472 | Shenshuitan | [4] |
| 46 | XI-<br>3390NCM29-<br>B5Gn  | quartz calcite vein<br>in phyllic<br>brecciated granite | galena       | 18.435 | 15.646 | 38.511 | Shenshuitan | [4] |
| 47 | XI-<br>3390NCM29-<br>B5Py  | quartz calcite vein<br>in phyllic<br>brecciated granite | pyrite       | 18.431 | 15.641 | 38.498 | Shenshuitan | [4] |
| 48 | XI-<br>3390NCM29-<br>B5Sp  | quartz calcite vein<br>in phyllic<br>brecciated granite | sphalerite   | 18.425 | 15.631 | 38.461 | Shenshuitan | [4] |

|    |                           |                                                         |              |        |        |        |             |     |
|----|---------------------------|---------------------------------------------------------|--------------|--------|--------|--------|-------------|-----|
| 49 | XI-<br>3390NCM29-<br>B6Po | pyritized slate                                         | pyrrhotite   | 18.483 | 15.669 | 38.667 | Shenshuitan | [4] |
| 50 | XI-<br>3390NCM29-<br>B6Py | pyritized slate                                         | pyrite       | 18.521 | 15.610 | 38.558 | Shenshuitan | [4] |
| 51 | XI-<br>3390NCM29-<br>B7Gn | quartz calcite vein<br>in phyllic<br>brecciated granite | galena       | 18.418 | 15.627 | 38.449 | Shenshuitan | [4] |
| 52 | XI-<br>3390NCM29-<br>B7Py | quartz calcite vein<br>in phyllic<br>brecciated granite | pyrite       | 18.454 | 15.666 | 38.576 | Shenshuitan | [4] |
| 53 | XI-<br>3390NCM29-<br>B7Sp | quartz calcite vein<br>in phyllic<br>brecciated granite | sphalerite   | 18.425 | 15.632 | 38.467 | Shenshuitan | [4] |
| 54 | XI-<br>3390NCM7-<br>B1Apy | phyllic brecciated<br>granite                           | arsenopyrite | 18.327 | 15.605 | 38.329 | Shenshuitan | [4] |
| 55 | XI-<br>3390NCM7-<br>B1Po  | phyllic brecciated<br>granite                           | pyrrhotite   | 18.369 | 15.610 | 38.381 | Shenshuitan | [4] |
| 56 | XI-<br>3390NCM7-<br>B1Py  | phyllic brecciated<br>granite                           | pyrite       | 18.364 | 15.623 | 38.407 | Shenshuitan | [4] |
| 57 | XI-<br>3390NCM7-<br>B2Py  | phyllic brecciated<br>granite                           | pyrite       | 18.346 | 15.628 | 38.403 | Shenshuitan | [4] |
| 58 | XI-<br>3390NCM7-<br>B3Gn  | pyritized slate                                         | galena       | 18.373 | 15.673 | 38.541 | Shenshuitan | [4] |
| 59 | XI-<br>3390NCM7-<br>B3Po  | pyritized slate                                         | pyrrhotite   | 18.388 | 15.649 | 38.474 | Shenshuitan | [4] |
| 60 | XI-<br>3390NCM7-<br>B3Py  | pyritized slate                                         | pyrite       | 18.366 | 15.655 | 38.483 | Shenshuitan | [4] |
| 61 | XI-<br>3390NCM7-<br>B3Sp  | pyritized slate                                         | sphalerite   | 18.345 | 15.631 | 38.410 | Shenshuitan | [4] |
| 62 | HLG-<br>PD3450-3-S6       | phyllic rock                                            | pyrite       | 18.352 | 15.648 | 38.470 | Shenshuitan | [7] |
| 63 | HLG-<br>PD3450-25-<br>S1  | phyllic rock                                            | pyrite       | 18.396 | 15.640 | 38.572 | Shenshuitan | [7] |
| 64 | HLG-<br>PD3450-19-<br>S3  | phyllic rock                                            | pyrite       | 18.346 | 15.636 | 38.398 | Shenshuitan | [7] |
| 65 | XI-SDNCM3-<br>B2-1        | phyllic rock                                            | pyrite       | 18.449 | 15.639 | 38.523 | Shenshuitan | [7] |
| 66 | XI-SDNCM3-<br>B5          | phyllic rock                                            | pyrite       | 18.449 | 15.642 | 38.502 | Shenshuitan | [7] |
| 67 | XI-SDNCM3-<br>B8          | phyllic rock                                            | pyrite       | 18.395 | 15.632 | 38.435 | Shenshuitan | [7] |
| 68 | SST-1                     | phyllic rock                                            | pyrite       | 18.460 | 15.650 | 38.580 | shenshuitan | [9] |
| 69 | SST-2                     | phyllic rock                                            | Galena       | 18.500 | 15.660 | 38.610 | shenshuitan | [9] |
| 70 | SST-3                     | phyllic rock                                            | pyrite       | 18.250 | 15.600 | 38.180 | shenshuitan | [9] |
| 71 | SST-4                     | phyllic rock                                            | pyrite       | 18.380 | 15.640 | 38.470 | shenshuitan | [9] |
| 72 | SST-5                     | phyllic rock                                            | Galena       | 18.620 | 15.950 | 39.580 | shenshuitan | [9] |
| 73 | SST-6                     | phyllic rock                                            | pyrite       | 18.360 | 15.610 | 38.300 | shenshuitan | [9] |
| 74 | SST-7                     | phyllic rock                                            | Galena       | 18.380 | 15.590 | 38.540 | shenshuitan | [9] |

|     |                  |                  |            |        |        |        |                  |      |
|-----|------------------|------------------|------------|--------|--------|--------|------------------|------|
| 75  | 337000PD01-B2-Py | quartz vein      | pyrite     | 18.453 | 15.635 | 38.450 | Hongqigou        | [60] |
| 76  | 337000PD01-B3-Py | quartz vein      | pyrite     | 18.424 | 15.678 | 38.538 | Hongqigou        | [60] |
| 77  | 3810PD301-B1-Py  | quartz vein      | pyrite     | 18.275 | 15.656 | 38.555 | Hongqigou        | [60] |
| 78  | 3810PD301-B1-Py  | quartz vein      | pyrite     | 18.265 | 15.655 | 38.535 | Hongqigou        | [60] |
| 79  | 3810PD301-B3-Py  | quartz vein      | pyrite     | 18.479 | 15.639 | 38.448 | Hongqigou        | [60] |
| 80  | 3810PD301-B4-Py  | quartz vein      | pyrite     | 18.422 | 15.632 | 38.388 | Hongqigou        | [60] |
| 81  | 3810PD301-B5-Py  | quartz vein      | pyrite     | 18.421 | 15.639 | 38.450 | Hongqigou        | [60] |
| 82  | 3810PD301-B6-Py  | quartz vein      | pyrite     | 18.297 | 15.624 | 38.469 | Hongqigou        | [60] |
| 83  | 3810PD301-B7-Py  | quartz vein      | pyrite     | 18.444 | 15.636 | 38.442 | Hongqigou        | [60] |
| 84  | ZK63-1-22        | phyllitic rock   | pyrite     | 18.124 | 15.546 | 37.986 | Guoluolongw<br>a | [16] |
| 85  | GB3              | quartz vein      | pyrite     | 18.102 | 15.524 | 37.979 | Guoluolongw<br>a | [16] |
| 86  | GB11             | quartz vein      | pyrite     | 18.118 | 15.545 | 38.002 | Guoluolongw<br>a | [16] |
| 87  | GB30-py          | quartz vein      | pyrite     | 18.094 | 15.544 | 37.962 | Guoluolongw<br>a | [16] |
| 88  | GB31-py-1        | quartz vein      | pyrite     | 18.135 | 15.585 | 38.110 | Guoluolongw<br>a | [16] |
| 89  | GB31-py-2        | quartz vein      | pyrite     | 18.057 | 15.527 | 37.965 | Guoluolongw<br>a | [16] |
| 90  | ZK63-1-25        | phyllitic rock   | galena     | 18.093 | 15.542 | 37.905 | Guoluolongw<br>a | [16] |
| 91  | GB30-Ga          | quartz vein      | galena     | 18.106 | 15.563 | 37.919 | Guoluolongw<br>a | [16] |
| 92  | GB31-Ga          | quartz vein      | galena     | 18.099 | 15.559 | 37.901 | Guoluolongw<br>a | [16] |
| 93  | GL-53-Py         | quartz vein      | pyrite     | 18.105 | 15.547 | 38.002 | Guoluolongw<br>a | [17] |
| 94  | GL-64-Py         | phyllitic rock   | pyrite     | 18.112 | 15.561 | 37.957 | Guoluolongw<br>a | [17] |
| 95  | GL-65-Py         | phyllitic rock   | pyrite     | 18.098 | 15.551 | 37.978 | Guoluolongw<br>a | [17] |
| 96  | GW-Py            | quartz vein      | pyrite     | 18.105 | 15.558 | 37.989 | Guoluolongw<br>a | [17] |
| 97  | GL-53-Ga         | quartz vein      | galena     | 18.062 | 15.549 | 37.987 | Guoluolongw<br>a | [17] |
| 98  | GL-64-Ga         | phyllitic rock   | galena     | 18.096 | 15.545 | 37.996 | Guoluolongw<br>a | [17] |
| 99  | GL-65-Ga         | phyllitic rock   | galena     | 18.113 | 15.552 | 37.988 | Guoluolongw<br>a | [17] |
| 100 | GW-Ga            | quartz vein      | galena     | 18.101 | 15.546 | 37.999 | Guoluolongw<br>a | [17] |
| 101 | Shzg-4           | quartz vein      | pyrite     | 18.412 | 15.628 | 38.471 | Kaihuangbei      | [20] |
| 102 | Kx-200           | phyllitic rock   | pyrite     | 18.431 | 15.578 | 38.353 | Kaihuangbei      | [20] |
| 103 | dqg-1            | phyllitic rock   | pyrite     | 18.453 | 15.638 | 38.528 | Kaihuangbei      | [20] |
| 104 | dqg-2            | quartz vein      | galena     | 18.423 | 15.639 | 38.501 | Kaihuangbei      | [20] |
| 105 | BLGTC104-B1      | Triassic granite | K-feldspar | 18.413 | 15.638 | 38.484 | Wulonggou        | [7]  |
| 106 | BLG-XJ-B8        | Triassic granite | K-feldspar | 18.411 | 15.634 | 38.496 | Wulonggou        | [7]  |
| 107 | BLG-XJ-B9        | Triassic granite | K-feldspar | 18.429 | 15.633 | 38.473 | Wulonggou        | [7]  |

|     |            |                  |            |        |        |        |           |     |
|-----|------------|------------------|------------|--------|--------|--------|-----------|-----|
| 108 | WLG-02-B01 | Triassic granite | K-feldspar | 18.593 | 15.632 | 38.436 | Wulonggou | [7] |
| 109 | WLG-03-B01 | Triassic granite | K-feldspar | 18.561 | 15.630 | 38.423 | Wulonggou | [7] |
| 110 | WLG-09-B01 | Triassic granite | K-feldspar | 18.488 | 15.628 | 38.443 | Wulonggou | [7] |
| 111 | WLG-19-B1  | Triassic granite | K-feldspar | 18.429 | 15.615 | 38.519 | Wulonggou | [7] |
