# Supplementary material
Source: MDPI journal article supplement (https://www.mdpi.com/2075-163X/13/2/274)
Supplement: s1 [file s1]

**Table S1.** H and O isotope data for quartz in the Heihaibei gold deposit and some typical gold deposits in the EKO from the literature.  $\delta D$  was measured in fluid inclusions;  $\delta^{18}O$  was measured in quartz;  $\delta^{18}O$  of water in equilibrium with quartz was calculated at the temperature indicated by Th [23] using the equation of  $1000\ln\alpha = 3.38 \times 10^6/T^2 - 3.4$  [55].

| No. | Sample Name   | Rock Type                         | Ore Type       | Mineral | $\Delta d_{vsmow}$ | $\Delta^{18}O_{vsmow}$ | $\Delta^{18}d_{h2o}$<br>‰ | $\Delta^{18}O_{h2o}$ ‰ | Average Th | Ore District | References |
|-----|---------------|-----------------------------------|----------------|---------|--------------------|------------------------|---------------------------|------------------------|------------|--------------|------------|
| 1   | HHBZK06-02-B2 | brecciated white quartz vein      | Qv1            | Quartz  | -97.2              | 13.4                   | -97.2                     | 7.8                    | 340.0      | Heihaibei    | this study |
| 2   | HHBZK06-02-B3 | smoky grey quartz vein            | Qv2            | Quartz  | -91.0              | 12.1                   | -91.0                     | 2.7                    | 241.0      | Heihaibei    | this study |
| 3   | HHBZK06-03-B2 | smoky grey quartz vein            | Qv2            | Quartz  | -101.8             | 12.6                   | -101.8                    | 3.2                    | 241.0      | Heihaibei    | this study |
| 4   | HHBZK06-03-B3 | brecciated smoky grey quartz vein | Qv2            | Quartz  | -97.7              | 12.8                   | -97.7                     | 3.4                    | 241.0      | Heihaibei    | this study |
| 5   | HHBZK06-03-B5 | brecciated smoky grey quartz vein | Qv2            | Quartz  | -102.3             | 13.3                   | -102.3                    | 3.9                    | 241.0      | Heihaibei    | this study |
| 6   | HHB08-JK01    | white quartz vein                 | Qv1            | Quartz  | -81.1              | 9.2                    | -81.1                     | 3.6                    | 340.0      | Heihaibei    | this study |
| 7   | HHB08-JK02-1  | smoky grey quartz vein            | Qv2            | Quartz  | -94.1              | 13.7                   | -94.1                     | 4.3                    | 241.0      | Heihaibei    | this study |
| 8   | HHB08-JK02-2  | smoky grey quartz vein            | Qv2            | Quartz  | -94.6              | 13.7                   | -94.6                     | 4.3                    | 241.0      | Heihaibei    | this study |
| 9   | HHB08-JK03    | smoky grey quartz vein            | Qv2            | Quartz  | -89.9              | 11.3                   | -89.9                     | 1.9                    | 241.0      | Heihaibei    | this study |
| 10  | HHB08-JK05    | smoky grey quartz vein            | Qv2            | Quartz  | -90.4              | 13.6                   | -90.4                     | 4.2                    | 241.0      | Heihaibei    | this study |
| 11  | HHB08-JK08    | smoky grey quartz vein            | Qv2            | Quartz  | -97.4              | 11.6                   | -97.4                     | 2.2                    | 241.0      | Heihaibei    | this study |
| 12  | HHB08-JK10    | white quartz vein                 | Qv1            | Quartz  | -92.8              | 13.9                   | -92.8                     | 8.3                    | 340.0      | Heihaibei    | this study |
| 13  | HHB08-JK15    | smoky grey quartz vein            | Qv2            | Quartz  | -97.6              | 11.6                   | -97.6                     | 2.2                    | 241.0      | Heihaibei    | this study |
| 14  | HHB08-JK17    | white quartz vein                 | Qv1            | Quartz  | -96.8              | 11.0                   | -96.8                     | 5.4                    | 340.0      | Heihaibei    | this study |
| 15  | HHB08-JK18    | smoky grey quartz vein            | Qv2            | Quartz  | -104.2             | 13.0                   | -104.2                    | 3.6                    | 241.0      | Heihaibei    | this study |
| 16  | HHB08-JK19    | smoky grey quartz vein            | Qv2            | Quartz  | -101.5             | 11.0                   | -101.5                    | 1.6                    | 241.0      | Heihaibei    | this study |
| 17  | K1            | silicificated monzogranite        | Qv1+wall rocks | Quartz  | -84.1              | 15.1                   | -84.1                     | 9.5                    | 340        | Heihaibei    | [23]       |
| 18  | K5            | smoky grey quartz vein            | Qv2            | Quartz  | -81.1              | 14.1                   | -81.1                     | 4.7                    | 241        | Heihaibei    | [23]       |
| 19  | K7            | smoky grey quartz vein            | Qv2            | Quartz  | -84                | 14                     | -84                       | 4.6                    | 241        | Heihaibei    | [23]       |
| 20  | ZK0709-6      | phyllitic rock                    |                | Quartz  | -62.4              | 16.5                   | -62.4                     | 6.1                    | 222        | Dazaohuo     | [29]       |
| 21  | ZK1609-10     | phyllitic rock                    |                | Quartz  | -69.1              | 16.4                   | -69.1                     | 6.0                    | 222        | Dazaohuo     | [29]       |
| 22  | ZK2417-17     | phyllitic rock                    |                | Quartz  | -64.6              | 17                     | -64.6                     | 6.6                    | 222        | Dazaohuo     | [29]       |
| 23  | ZK5601-13     | phyllitic rock                    |                | Quartz  | -64.6              | 15.7                   | -64.6                     | 5.3                    | 222        | Dazaohuo     | [29]       |
| 24  | TC25-1        | quartz vein                       |                | Quartz  | -55                | 15.6                   | -55                       | 5.5                    | 227        | Heicigou     | [29]       |
| 25  | TC25-3        | quartz vein                       |                | Quartz  | -59                | 15.7                   | -59                       | 5.6                    | 227        | Heicigou     | [29]       |
| 26  | TC20-2        | quartz vein                       |                | Quartz  | -56                | 15.9                   | -56                       | 5.8                    | 227        | Heicigou     | [29]       |
| 27  | TC20-3        | quartz vein                       |                | Quartz  | -51                | 16.1                   | -51                       | 6.0                    | 227        | Heicigou     | [29]       |
| 28  | ZK001-7       | quartz vein                       |                | Quartz  | -85                | 11.4                   | -85                       | 1.3                    | 227        | Heicigou     | [29]       |
| 29  | ZK001-8       | quartz vein                       |                | Quartz  | -97                | 10.6                   | -97                       | 0.5                    | 227        | Heicigou     | [29]       |

|    |                         |              |          |        |      |        |      |     |                 |      |
|----|-------------------------|--------------|----------|--------|------|--------|------|-----|-----------------|------|
| 30 | XI-<br>3390NCM<br>7-B1  | phyllic rock | quartz   | -110.6 | 4.6  | -110.6 | -3.8 | 262 | Shenshuit<br>an | [4]  |
| 31 | XI-<br>3390NCM<br>7-B2  | phyllic rock | quartz   | -112.4 | 10.7 | -112.4 | 2.3  | 262 | Shenshuit<br>an | [4]  |
| 32 | XI-<br>3390NCM<br>7-B3  | phyllic rock | quartz   | -112.3 | 12.0 | -112.3 | 3.6  | 262 | Shenshuit<br>an | [4]  |
| 33 | XI-<br>3390NCM<br>11-B1 | phyllic rock | quartz   | -103.6 | 11.2 | -103.6 | 2.8  | 262 | Shenshuit<br>an | [4]  |
| 34 | XI-<br>3390NCM<br>11-B3 | phyllic rock | quartz   | -113.9 | 11.3 | -113.9 | 2.9  | 262 | Shenshuit<br>an | [4]  |
| 35 | XI-<br>3390NCM<br>17-B2 | phyllic rock | sericite | -93.1  | 5.5  | -73.1  | 0.9  | 262 | Shenshuit<br>an | [4]  |
| 36 | XI-<br>SDNCM3-<br>B2-1  | phyllic rock | sericite | -89.7  | 7.6  | -69.7  | 3.0  | 262 | Shenshuit<br>an | [10] |
| 37 | XI-<br>SDNCM3-<br>B7    | phyllic rock | sericite | -88.3  | 5.9  | -68.3  | 1.3  | 262 | Shenshuit<br>an | [10] |
| 38 | XI-<br>SDNCM3-<br>B8A   | phyllic rock | sericite | -94.5  | 5.7  | -74.5  | 1.1  | 262 | Shenshuit<br>an | [10] |
| 39 | WL23-5                  | phyllic rock | quartz   | -87.0  | 15.1 | -87.0  | 6.7  | 262 | Shenshuit<br>an | [8]  |
| 40 | WL29-5                  | phyllic rock | quartz   | -90.0  | 11.6 | -90.0  | 3.2  | 262 | Shenshuit<br>an | [8]  |
| 41 | WL26-4-1                | phyllic rock | quartz   | -107.0 | 11.3 | -107.0 | 2.9  | 262 | Shenshuit<br>an | [8]  |
| 42 | WL26-4-2                | phyllic rock | quartz   | -82.0  | 11.7 | -82.0  | 3.3  | 262 | Shenshuit<br>an | [8]  |
| 43 | WL43-1                  | phyllic rock | quartz   | -97.0  | 10.8 | -97.0  | 2.4  | 262 | Shenshuit<br>an | [8]  |
| 44 | WL44-1                  | phyllic rock | quartz   | -63.0  | 13.2 | -63.0  | 4.8  | 262 | Shenshuit<br>an | [8]  |
| 45 | SZDG-<br>ZK9302-<br>OH1 | phyllic rock | quartz   | -93.6  | 12.0 | -93.6  | 3.6  | 262 | Shenshuit<br>an | [9]  |
| 46 | SZDG-<br>3270-CO1       | phyllic rock | quartz   | -97.2  | 11.9 | -97.2  | 3.5  | 262 | Shenshuit<br>an | [9]  |
| 47 | SZDG-<br>3270-CO4       | phyllic rock | quartz   | -105.7 | 13.1 | -105.7 | 4.7  | 262 | Shenshuit<br>an | [9]  |
| 48 | SZDG-<br>3270-CO5       | phyllic rock | quartz   | -84.6  | 10.1 | -84.6  | 1.7  | 262 | Shenshuit<br>an | [9]  |
| 49 | SZDG-<br>ZK9302-<br>CO6 | phyllic rock | quartz   | -98.0  | 11.0 | -98.0  | 2.6  | 262 | Shenshuit<br>an | [9]  |
| 50 | 337000PD<br>01-B2-Q     | quartz vein  | quartz   | -91.1  | 14.7 | -91.1  | 6.2  | 262 | Hongqigo<br>u   | [60] |
| 51 | 3810PD30<br>1-B4-Q      | quartz vein  | quartz   | -80.4  | 13.9 | -80.4  | 5.5  | 262 | Hongqigo<br>u   | [60] |
| 52 | 3810PD30<br>1-B5-Q      | quartz vein  | quartz   | -87.8  | 13.9 | -87.8  | 5.5  | 262 | Hongqigo<br>u   | [60] |
| 53 | 3810PD30<br>1-B7-Q      | quartz vein  | quartz   | -85.5  | 14.4 | -85.5  | 6.0  | 262 | Hongqigo<br>u   | [60] |
| 54 | 3810PD30<br>1-B8-Q      | quartz vein  | quartz   | -121.5 | 12.8 | -121.5 | 4.4  | 262 | Hongqigo<br>u   | [60] |

|    |          |              |        |      |      |        |     |       |                  |      |
|----|----------|--------------|--------|------|------|--------|-----|-------|------------------|------|
| 55 | GLLW-B1  | phyllie rock | quartz | -61  | 15.8 | -61.0  | 7.0 | 254.1 | Guoluolon<br>gwa | [19] |
| 56 | GLLW-B5  | phyllie rock | quartz | -83  | 16   | -83.0  | 7.1 | 251.3 | Guoluolon<br>gwa | [19] |
| 57 | GLLW-B6  | phyllie rock | quartz | -79  | 15.1 | -79.0  | 6.2 | 251.3 | Guoluolon<br>gwa | [19] |
| 58 | GLLW-B7  | quartz vein  | quartz | -87  | 15.6 | -87.0  | 6.7 | 251.3 | Guoluolon<br>gwa | [19] |
| 59 | GLLW-B10 | phyllie rock | quartz | -81  | 17.2 | -81.0  | 8.3 | 251.3 | Guoluolon<br>gwa | [19] |
| 60 | GLLW-B12 | quartz vein  | quartz | -88  | 14.8 | -88.0  | 5.9 | 251.3 | Guoluolon<br>gwa | [19] |
| 61 | GLLW-B13 | phyllie rock | quartz | -64  | 15.2 | -64.0  | 6.3 | 251.3 | Guoluolon<br>gwa | [19] |
| 62 | GLLW-B14 | quartz vein  | quartz | -72  | 16.2 | -72.0  | 7.3 | 251.3 | Guoluolon<br>gwa | [19] |
| 63 | GLLW-B16 | quartz vein  | quartz | -80  | 15.8 | -80.0  | 5.5 | 223.6 | Guoluolon<br>gwa | [19] |
| 64 | GLLW-B17 | phyllie rock | quartz | -89  | 14.9 | -89.0  | 6.0 | 251.3 | Guoluolon<br>gwa | [19] |
| 65 | GLLW-B18 | phyllie rock | quartz | -83  | 16.2 | -83.0  | 8.5 | 278.5 | Guoluolon<br>gwa | [19] |
| 66 | GLLW-B19 | phyllie rock | quartz | -83  | 15.7 | -83.0  | 6.8 | 251.3 | Guoluolon<br>gwa | [19] |
| 67 | GLLW-B20 | phyllie rock | quartz | -89  | 16.6 | -89.0  | 7.7 | 251.3 | Guoluolon<br>gwa | [19] |
| 68 | GLLW-B22 | quartz vein  | quartz | -96  | 16.5 | -96.0  | 7.6 | 251.3 | Guoluolon<br>gwa | [19] |
| 69 | GLLW-B21 | quartz vein  | quartz | -84  | 16.2 | -84.0  | 4.6 | 201.2 | Guoluolon<br>gwa | [19] |
| 70 | GLLW-B23 | quartz vein  | quartz | -91  | 16.7 | -91.0  | 5.1 | 201.2 | Guoluolon<br>gwa | [19] |
| 71 | GLLW-B24 | quartz vein  | quartz | -101 | 16.9 | -101.0 | 5.3 | 201.2 | Guoluolon<br>gwa | [19] |
| 72 | GLLW-B25 | quartz vein  | quartz | -96  | 15.7 | -96.0  | 4.1 | 201.2 | Guoluolon<br>gwa | [19] |
| 73 | GLLW-B30 | quartz vein  | quartz | -91  | 16.6 | -91.0  | 4.8 | 198.1 | Guoluolon<br>gwa | [19] |
| 74 | Kh-4     | quartz vein  | quartz | -71  | 17.1 | -71.0  | 8.2 | 250   | Kaihuang<br>bei  | [14] |
| 75 | Kh-5     | quartz vein  | quartz | -93  | 17.0 | -93.0  | 4.6 | 190   | Kaihuang<br>bei  | [14] |
| 76 | Shzg-4   | quartz vein  | quartz | -95  | 16.8 | -95.0  | 4.4 | 190   | Kaihuang<br>bei  | [14] |
| 77 | Khb44-2  |              | quartz | -66  | 15.2 | -66.0  | 8.3 | 300   | Kaihuang<br>bei  | [14] |
| 78 | CKK3     |              | quartz | -89  | 16.7 | -89.0  | 5.0 | 200   | Kaihuang<br>bei  | [14] |
