# Supplementary material
Source: MDPI journal article supplement (https://www.mdpi.com/2075-163X/13/2/274)
Supplement: s1 [file s1]

**Table S3.** Sulfur isotope data for sulfides in the Heihaibei deposit and some typical gold deposits in the EKO from the literature.  $\delta^{34}\text{S}_{\text{H}_2\text{S}}$  means  $\delta^{34}\text{S}_{\text{VCDT}}$  values for  $\text{H}_2\text{S}$  in equilibrium with sulfides. The assumed temperatures of equilibrium for different ore types are the same as Th [23] listed in Table 1.

| No. | Sample Name        | Rock Type                         | Ore Type       | Mineral      | $\Delta^{34}\text{S}_{\text{cdt}}(\text{‰})$ | $\Delta^{34}\text{S}_{\text{H}_2\text{S}}(\text{‰})$ | Ore District | References |
|-----|--------------------|-----------------------------------|----------------|--------------|----------------------------------------------|------------------------------------------------------|--------------|------------|
| 1   | HHBZK01-B3         | brecciated smoky grey quartz vein | Qv2            | Pyrite       | 8.5                                          | 7.0                                                  | Heihaibei    | this study |
| 2   | HHBZK01-B5         | brecciated smoky grey quartz vein | Qv2            | Pyrite       | 8.0                                          | 6.5                                                  | Heihaibei    | this study |
| 3   | HHBZK01-B6         | brecciated smoky grey quartz vein | Qv2            | Pyrite       | 7.7                                          | 6.2                                                  | Heihaibei    | this study |
| 4   | HHBZK0603-B2       | smoky grey quartz vein            | Qv2            | Pyrite       | 8.0                                          | 6.5                                                  | Heihaibei    | this study |
| 5   | HHBZK0603-B3       | brecciated smoky grey quartz vein | Qv2            | Pyrite       | 7.6                                          | 6.1                                                  | Heihaibei    | this study |
| 6   | HHBZK0603-B5       | brecciated smoky grey quartz vein | Qv2            | Pyrite       | 8.0                                          | 6.5                                                  | Heihaibei    | this study |
| 7   | HHBZK1003-B11      | brecciated smoky grey quartz vein | Qv2            | Pyrite       | 7.6                                          | 6.1                                                  | Heihaibei    | this study |
| 8   | HHBZK1002-B4-1     | brecciated white quartz vein      | Qv1            | Pyrite       | 8.1                                          | 7.0                                                  | Heihaibei    | this study |
| 9   | HHBZK1002-B4-2     | brecciated white quartz vein      | Qv1            | Pyrite       | 8.0                                          | 6.9                                                  | Heihaibei    | this study |
| 10  | HHBZK1002-B6       | brecciated white quartz vein      | Qv1            | Pyrite       | 8.0                                          | 6.9                                                  | Heihaibei    | this study |
| 11  | HHBZK1002-B8       | brecciated white quartz vein      | Qv1            | Pyrite       | 8.1                                          | 7.0                                                  | Heihaibei    | this study |
| 12  | HHBZK1002-B11      | brecciated smoky grey quartz vein | Qv2            | Pyrite       | 7.8                                          | 6.3                                                  | Heihaibei    | this study |
| 13  | HHB08-JK02         | smoky grey quartz vein            | Qv2            | Pyrite       | 8.5                                          | 7.0                                                  | Heihaibei    | this study |
| 14  | HHB08-JK08         | smoky grey quartz vein            | Qv2            | Pyrite       | 8.0                                          | 6.5                                                  | Heihaibei    | this study |
| 15  | HHB08-JK13         | smoky grey quartz vein            | Qv2            | Pyrite       | 8.3                                          | 6.8                                                  | Heihaibei    | this study |
| 16  | HHB08-JK15         | smoky grey quartz vein            | Qv2            | Pyrite       | 8.2                                          | 6.7                                                  | Heihaibei    | this study |
| 17  | HHB08-JK17         | white quartz vein                 | Qv1            | Pyrite       | 8.7                                          | 7.6                                                  | Heihaibei    | this study |
| 18  | K1                 | silicified monzogranite           | Qv1+wall rocks | Arsenopyrite | 8.5                                          |                                                      | Heihaibei    | [23]       |
| 19  | K5                 | smoky grey quartz vein            | Qv2            | Pyrite       | 7.7                                          |                                                      | Heihaibei    | [23]       |
| 20  | K8                 | smoky grey quartz vein            | Qv2            | Pyrite       | 7.9                                          |                                                      | Heihaibei    | [23]       |
| 21  | ZK5601-16          | phyllic rock                      |                | Pyrite       | 7.5                                          |                                                      | Dazaohuo     | [29]       |
| 22  | ZK2417-12          | phyllic rock                      |                | Pyrite       | 8.0                                          |                                                      | Dazaohuo     | [29]       |
| 23  | ZK1609-5           | phyllic rock                      |                | Pyrite       | 6.0                                          |                                                      | Dazaohuo     | [29]       |
| 24  | ZK1609-11          | phyllic rock                      |                | Pyrite       | 8.1                                          |                                                      | Dazaohuo     | [29]       |
| 25  | ZK3209-10          | phyllic rock                      |                | Pyrite       | 6.7                                          |                                                      | Dazaohuo     | [29]       |
| 26  | ZK3209-17          | phyllic rock                      |                | Pyrite       | 6.2                                          |                                                      | Dazaohuo     | [29]       |
| 27  | ZK0709-8           | phyllic rock                      |                | Pyrite       | 4.4                                          |                                                      | Dazaohuo     | [29]       |
| 28  | XI-3390NCM11-B1Apy | phyllic brecciated granite        |                | arsenopyrite | 1.0                                          |                                                      | Shenshuitan  | [4]        |
| 29  | XI-3390NCM11-B1Po  | phyllic brecciated granite        |                | pyrrhotite   | 0.7                                          |                                                      | Shenshuitan  | [4]        |
| 30  | XI-3390NCM11-B1Py  | phyllic brecciated granite        |                | pyrite       | -1.6                                         |                                                      | Shenshuitan  | [4]        |
| 31  | XI-3390NCM11-B2Apy | phyllic brecciated granite        |                | arsenopyrite | 1.3                                          |                                                      | Shenshuitan  | [4]        |

|    |                            |                               |              |      |             |     |
|----|----------------------------|-------------------------------|--------------|------|-------------|-----|
| 32 | XI-<br>3390NCM11-<br>B2Po  | phyllic brecciated<br>granite | pyrrhotite   | -0.7 | Shenshuitan | [4] |
| 33 | XI-<br>3390NCM11-<br>B2Py  | phyllic brecciated<br>granite | pyrite       | -0.2 | Shenshuitan | [4] |
| 34 | XI-<br>3390NCM11-<br>B3Apy | phyllic brecciated<br>granite | arsenopyrite | 1.7  | Shenshuitan | [4] |
| 35 | XI-<br>3390NCM11-<br>B3Py  | phyllic brecciated<br>granite | pyrite       | 1.3  | Shenshuitan | [4] |
| 36 | XI-<br>3390NCM17-<br>B1Py  | phyllic brecciated<br>granite | pyrite       | -7.3 | Shenshuitan | [4] |
| 37 | XI-<br>3390NCM17-<br>B2Apy | phyllic brecciated<br>granite | arsenopyrite | 0.2  | Shenshuitan | [4] |
| 38 | XI-<br>3390NCM17-<br>B2Po  | phyllic brecciated<br>granite | pyrrhotite   | -2.6 | Shenshuitan | [4] |
| 39 | XI-<br>3390NCM17-<br>B2Py  | phyllic brecciated<br>granite | pyrite       | -2.1 | Shenshuitan | [4] |
| 40 | XI-<br>3390NCM27-<br>B1Py  | phyllic brecciated<br>granite | pyrite       | -3.7 | Shenshuitan | [4] |
| 41 | XI-<br>3390NCM27-<br>B2Apy | phyllic brecciated<br>granite | arsenopyrite | 4.9  | Shenshuitan | [4] |
| 42 | XI-<br>3390NCM27-<br>B3Apy | pyritized slate               | arsenopyrite | 5.4  | Shenshuitan | [4] |
| 43 | XI-<br>3390NCM27-<br>B3Po  | pyritized slate               | pyrrhotite   | 7.1  | Shenshuitan | [4] |
| 44 | XI-<br>3390NCM29-<br>B1Po  | phyllic brecciated<br>granite | pyrrhotite   | 6.3  | Shenshuitan | [4] |
| 45 | XI-<br>3390NCM29-<br>B1Py  | phyllic brecciated<br>granite | pyrite       | 6.2  | Shenshuitan | [4] |
| 46 | XI-<br>3390NCM29-<br>B2Apy | phyllic brecciated<br>granite | arsenopyrite | 1.8  | Shenshuitan | [4] |
| 47 | XI-<br>3390NCM29-<br>B2Py  | phyllic brecciated<br>granite | pyrite       | 3.0  | Shenshuitan | [4] |
| 48 | XI-<br>3390NCM29-<br>B3Apy | phyllic brecciated<br>granite | arsenopyrite | 0.7  | Shenshuitan | [4] |
| 49 | XI-<br>3390NCM29-<br>B3Py  | phyllic brecciated<br>granite | pyrite       | 0.5  | Shenshuitan | [4] |
| 50 | XI-<br>3390NCM29-<br>B4Apy | phyllic brecciated<br>granite | arsenopyrite | 1.6  | Shenshuitan | [4] |
| 51 | XI-<br>3390NCM29-<br>B4Po  | phyllic brecciated<br>granite | pyrrhotite   | 0.9  | Shenshuitan | [4] |

|    |                   |                                                   |              |     |             |     |
|----|-------------------|---------------------------------------------------|--------------|-----|-------------|-----|
| 52 | XI-3390NCM29-B4Py | phyllic brecciated granite                        | pyrite       | 0.3 | Shenshuitan | [4] |
| 53 | XI-3390NCM29-B5Gn | quartz calcite vein in phyllic brecciated granite | galena       | 3.3 | Shenshuitan | [4] |
| 54 | XI-3390NCM29-B5Py | quartz calcite vein in phyllic brecciated granite | pyrite       | 4.0 | Shenshuitan | [4] |
| 55 | XI-3390NCM29-B5Sp | quartz calcite vein in phyllic brecciated granite | sphalerite   | 4.4 | Shenshuitan | [4] |
| 56 | XI-3390NCM29-B6Po | pyritized slate                                   | pyrrhotite   | 8.3 | Shenshuitan | [4] |
| 57 | XI-3390NCM29-B6Py | pyritized slate                                   | pyrite       | 9.6 | Shenshuitan | [4] |
| 58 | XI-3390NCM29-B7Gn | quartz calcite vein in phyllic brecciated granite | galena       | 3.0 | Shenshuitan | [4] |
| 59 | XI-3390NCM29-B7Py | quartz calcite vein in phyllic brecciated granite | pyrite       | 4.4 | Shenshuitan | [4] |
| 60 | XI-3390NCM29-B7Sp | quartz calcite vein in phyllic brecciated granite | sphalerite   | 5.7 | Shenshuitan | [4] |
| 61 | XI-3390NCM7-B1Apy | phyllic brecciated granite                        | arsenopyrite | 2.8 | Shenshuitan | [4] |
| 62 | XI-3390NCM7-B1Po  | phyllic brecciated granite                        | pyrrhotite   | 3.5 | Shenshuitan | [4] |
| 63 | XI-3390NCM7-B1Py  | phyllic brecciated granite                        | pyrite       | 1.9 | Shenshuitan | [4] |
| 64 | XI-3390NCM7-B2Py  | phyllic brecciated granite                        | pyrite       | 3.1 | Shenshuitan | [4] |
| 65 | XI-3390NCM7-B3Gn  | pyritized slate                                   | galena       | 2.8 | Shenshuitan | [4] |
| 66 | XI-3390NCM7-B3Po  | pyritized slate                                   | pyrrhotite   | 5.8 | Shenshuitan | [4] |
| 67 | XI-3390NCM7-B3Py  | pyritized slate                                   | pyrite       | 5.4 | Shenshuitan | [4] |
| 68 | XI-3390NCM7-B3Sp  | pyritized slate                                   | sphalerite   | 6.6 | Shenshuitan | [4] |
| 69 | XI-SDNCM3-B1      | phyllic rock                                      | pyrite       | 4.4 | Shenshuitan | [7] |
| 70 | XI-SDNCM3-B2-1    | phyllic rock                                      | pyrite       | 3.7 | Shenshuitan | [7] |
| 71 | XI-SDNCM3-B5      | phyllic rock                                      | pyrite       | 5.4 | Shenshuitan | [7] |
| 72 | XI-SDNCM3-B7      | phyllic rock                                      | pyrite       | 5.9 | Shenshuitan | [7] |
| 73 | XI-SDNCM3-B8      | phyllic rock                                      | pyrite       | 4.2 | Shenshuitan | [7] |
| 74 | HLG-PD3450-19-S3  | phyllic rock                                      | pyrite       | 0.4 | Shenshuitan | [7] |
| 75 | HLG-PD3450-25-S1  | phyllic rock                                      | pyrite       | 1.0 | Shenshuitan | [7] |
| 76 | HLG-PD3450-3-S6   | phyllic rock                                      | pyrite       | 8.5 | Shenshuitan | [7] |
| 77 | SZDG-ZK9104-S1    | phyllic rock                                      | pyrite       | 4.0 | Shenshuitan | [7] |

|     |                  |              |              |       |              |      |
|-----|------------------|--------------|--------------|-------|--------------|------|
| 78  | SZDG-ZK9104-S2   | phyllic rock | pyrite       | 4.4   | Shenshuitan  | [7]  |
| 79  | SZDG-ZK9302-S2   | phyllic rock | pyrite       | 5.2   | Shenshuitan  | [7]  |
| 80  | SZDG-ZK9302-S3   | phyllic rock | pyrite       | 3.8   | Shenshuitan  | [7]  |
| 81  | SZDG-ZK9302-S4   | phyllic rock | pyrite       | 3.4   | Shenshuitan  | [7]  |
| 82  | WL23-1           | phyllic rock | Pyrite       | 3.6   | Shenshuitan  | [8]  |
| 83  | WL23-1a          | phyllic rock | Pyrite       | 3.4   | Shenshuitan  | [8]  |
| 84  | WL24-3           | phyllic rock | Pyrite       | 4.1   | Shenshuitan  | [8]  |
| 85  | WL25-1           | phyllic rock | arsenopyrite | 2.7   | Shenshuitan  | [8]  |
| 86  | WL25-1a          | phyllic rock | arsenopyrite | 2.7   | Shenshuitan  | [8]  |
| 87  | WL27-1           | phyllic rock | Pyrite       | 2.3   | Shenshuitan  | [8]  |
| 88  | WL28-1           | phyllic rock | Pyrite       | 1.0   | Shenshuitan  | [8]  |
| 89  | WL28-2-1         | phyllic rock | arsenopyrite | 3.1   | Shenshuitan  | [8]  |
| 90  | WL28-2-2         | phyllic rock | arsenopyrite | 2.7   | Shenshuitan  | [8]  |
| 91  | WL29-1           | phyllic rock | Pyrite       | 5.0   | Shenshuitan  | [8]  |
| 92  | WL30-3           | quartz vein  | Galena       | 3.0   | Shenshuitan  | [8]  |
| 93  | WL30-5           | phyllic rock | Pyrite       | 6.9   | Shenshuitan  | [8]  |
| 94  | WL31-1           | phyllic rock | Pyrite       | 7.9   | Shenshuitan  | [8]  |
| 95  | WL45-1           | phyllic rock | Pyrite       | 5.4   | Shenshuitan  | [8]  |
| 96  | WL43-1           | phyllic rock | Pyrite       | 4.8   | Shenshuitan  | [8]  |
| 97  | WL43-1a          | phyllic rock | Pyrite       | 5.0   | Shenshuitan  | [8]  |
| 98  | WL40-1           | quartz vein  | Galena       | 3.9   | Shenshuitan  | [8]  |
| 99  | 337000PD01-B2-Py | quartz vein  | pyrite       | 11.94 | Hongqigou    | [60] |
| 100 | 337000PD01-B3-Py | quartz vein  | pyrite       | 10.53 | Hongqigou    | [60] |
| 101 | 3810PD301-B1-Py  | quartz vein  | pyrite       | 4.50  | Hongqigou    | [60] |
| 102 | 3810PD301-B3-Py  | quartz vein  | pyrite       | 11.76 | Hongqigou    | [60] |
| 103 | 3810PD301-B4-Py  | quartz vein  | pyrite       | 11.62 | Hongqigou    | [60] |
| 104 | 3810PD301-B5-Py  | quartz vein  | pyrite       | 12.87 | Hongqigou    | [60] |
| 105 | 3810PD301-B6-Py  | quartz vein  | pyrite       | 9.31  | Hongqigou    | [60] |
| 106 | 3810PD301-B7-Py  | quartz vein  | pyrite       | 12.17 | Hongqigou    | [60] |
| 107 | B2001-1-2        |              | pyrite       | 5.2   | Guoluolongwa | [15] |
| 108 | B2008-1-2        |              | pyrite       | 2.8   | Guoluolongwa | [15] |
| 109 | B2002-1-2        |              | pyrite       | 3.4   | Guoluolongwa | [15] |
| 110 | B2003-1-2        |              | pyrite       | 4.1   | Guoluolongwa | [15] |
| 111 | B2001-1-3        |              | pyrite       | 3.1   | Guoluolongwa | [15] |
| 112 | B2006-1-3        |              | Galena       | 1.6   | Guoluolongwa | [15] |
| 113 | B2007-1-3        |              | pyrite       | 4.1   | Guoluolongwa | [15] |
| 114 | ZK63-1-22        | phyllic rock | pyrite       | 3.88  | Guoluolongwa | [16] |
| 115 | GB3              | quartz vein  | pyrite       | 0.2   | Guoluolongwa | [16] |
| 116 | GB11             | quartz vein  | pyrite       | 3.51  | Guoluolongwa | [16] |
| 117 | GB30-py          | quartz vein  | pyrite       | 1.23  | Guoluolongwa | [16] |
| 118 | GB31-py-1        | quartz vein  | pyrite       | 2.77  | Guoluolongwa | [16] |
| 119 | GB31-py-2        | quartz vein  | pyrite       | 1.66  | Guoluolongwa | [16] |
| 120 | ZK63-1-25        | phyllic rock | Galena       | -5.95 | Guoluolongwa | [16] |
| 121 | GB30-Ga          | quartz vein  | Galena       | -2.03 | Guoluolongwa | [16] |
| 122 | GB31-Ga          | quartz vein  | Galena       | -2.41 | Guoluolongwa | [16] |
| 123 | GL-10            | phyllic rock | pyrite       | -1.53 | Guoluolongwa | [17] |
| 124 | GL-11            | phyllic rock | pyrite       | -5.22 | Guoluolongwa | [17] |
| 125 | GL-14            | quartz vein  | pyrite       | 0.07  | Guoluolongwa | [17] |

|     |          |              |        |       |              |      |
|-----|----------|--------------|--------|-------|--------------|------|
| 126 | GL-15    | quartz vein  | pyrite | -5.82 | Guoluolongwa | [17] |
| 127 | GL-16    | quartz vein  | pyrite | -5.24 | Guoluolongwa | [17] |
| 128 | GL-24    | quartz vein  | pyrite | 4.4   | Guoluolongwa | [17] |
| 129 | GL-28    | phyllic rock | pyrite | -1.8  | Guoluolongwa | [17] |
| 130 | GL-31    | quartz vein  | pyrite | 1.47  | Guoluolongwa | [17] |
| 131 | GL-34    | quartz vein  | pyrite | 3.09  | Guoluolongwa | [17] |
| 132 | GL-36    | phyllic rock | pyrite | 4.5   | Guoluolongwa | [17] |
| 133 | GL-39    | quartz vein  | pyrite | 1.27  | Guoluolongwa | [17] |
| 134 | GL-40    | quartz vein  | pyrite | 1.56  | Guoluolongwa | [17] |
| 135 | GL-42    | quartz vein  | pyrite | 3.11  | Guoluolongwa | [17] |
| 136 | GL-43    | quartz vein  | pyrite | -2.48 | Guoluolongwa | [17] |
| 137 | GL-44    | quartz vein  | pyrite | 3.9   | Guoluolongwa | [17] |
| 138 | GL-45    | quartz vein  | pyrite | 2.11  | Guoluolongwa | [17] |
| 139 | GL-46    | quartz vein  | pyrite | -1.56 | Guoluolongwa | [17] |
| 140 | GL-50    | quartz vein  | pyrite | 1.14  | Guoluolongwa | [17] |
| 141 | GL-51    | quartz vein  | pyrite | 4.53  | Guoluolongwa | [17] |
| 142 | GL-52    | quartz vein  | pyrite | 4.42  | Guoluolongwa | [17] |
| 143 | GL-53    | quartz vein  | pyrite | 1.79  | Guoluolongwa | [17] |
| 144 | GL-55    | quartz vein  | pyrite | 5.23  | Guoluolongwa | [17] |
| 145 | GL-59    | phyllic rock | pyrite | 0.83  | Guoluolongwa | [17] |
| 146 | GL-60    | quartz vein  | pyrite | 3.51  | Guoluolongwa | [17] |
| 147 | GL-61    | quartz vein  | pyrite | 1.70  | Guoluolongwa | [17] |
| 148 | GL-67    | quartz vein  | pyrite | 4.14  | Guoluolongwa | [17] |
| 149 | GL-69    | phyllic rock | pyrite | 3.81  | Guoluolongwa | [17] |
| 150 | GL-78    | quartz vein  | pyrite | 3.52  | Guoluolongwa | [17] |
| 151 | GW-py    | quartz vein  | pyrite | 1.33  | Guoluolongwa | [17] |
| 152 | GW-gn    | quartz vein  | Galena | -2.91 | Guoluolongwa | [17] |
| 153 | GL12     | quartz vein  | Galena | 0.56  | Guoluolongwa | [17] |
| 154 | GL33     | quartz vein  | Galena | -1.3  | Guoluolongwa | [17] |
| 155 | Shzg-4   | quartz vein  | pyrite | 6.1   | Kaihuangbei  | [20] |
| 156 | Kx-200   | phyllic rock | pyrite | 3.2   | Kaihuangbei  | [20] |
| 157 | dqg-1    | phyllic rock | pyrite | 4.9   | Kaihuangbei  | [20] |
| 158 | dqg-2-Py | quartz vein  | pyrite | 4.8   | Kaihuangbei  | [20] |
| 159 | dqg-2-Ga | quartz vein  | galena | 3.0   | Kaihuangbei  | [20] |
